# Supplementary material for: Solvent-regulated fluorescence off–on signaling of Ni(ii) and Zn(ii) with the formation of two mononuclear complexes with an ATP detection ability by Zn(ii) assembly
Source: Royal Society of Chemistry journal article supplement (doi:10.1039/d2an01938h), 2022-12-20

---

The following ALERTS were generated. Each ALERT has the format

**test-name\_ALERT\_alert-type\_alert-level.**

Click on the hyperlinks for more details of the test.

---

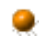

### Alert level B

PLAT934\_ALERT\_3\_B Number of (Iobs-Icalc)/Sigma(W) > 10 Outliers .. 2 Check

**Author Response: It may be due to presence of some overlaped reflections  
that we could not avoid during refinement.**

---

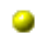

### Alert level C

RINTA01\_ALERT\_3\_C The value of Rint is greater than 0.12  
Rint given 0.140

|                                                                    |         |        |
|--------------------------------------------------------------------|---------|--------|
| PLAT029_ALERT_3_C _diffrn_measured_fraction_theta_full value Low . | 0.969   | Why?   |
| PLAT243_ALERT_4_C High 'Solvent' Ueq as Compared to Neighbors of   | 066     | Check  |
| PLAT243_ALERT_4_C High 'Solvent' Ueq as Compared to Neighbors of   | C67     | Check  |
| PLAT243_ALERT_4_C High 'Solvent' Ueq as Compared to Neighbors of   | C68     | Check  |
| PLAT243_ALERT_4_C High 'Solvent' Ueq as Compared to Neighbors of   | C71     | Check  |
| PLAT243_ALERT_4_C High 'Solvent' Ueq as Compared to Neighbors of   | C72     | Check  |
| PLAT260_ALERT_2_C Large Average Ueq of Residue Including S65A      | 0.158   | Check  |
| PLAT260_ALERT_2_C Large Average Ueq of Residue Including S69A      | 0.160   | Check  |
| PLAT341_ALERT_3_C Low Bond Precision on C-C Bonds .....            | 0.00748 | Ang.   |
| PLAT601_ALERT_2_C Unit Cell Contains Solvent Accessible VOIDS of . | 65      | Ang**3 |
| PLAT906_ALERT_3_C Large K Value in the Analysis of Variance .....  | 5.460   | Check  |
| PLAT911_ALERT_3_C Missing FCF Refl Between Thmin & STh/L= 0.600    | 390     | Report |
| PLAT913_ALERT_3_C Missing # of Very Strong Reflections in FCF .... | 25      | Note   |
| PLAT918_ALERT_3_C Reflection(s) with I(obs) much Smaller I(calc) . | 2       | Check  |
| PLAT939_ALERT_3_C Large Value of Not (SHELXL) Weight Optimized S . | 34.63   | Check  |

---

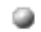

### Alert level G

|                                                                    |        |        |
|--------------------------------------------------------------------|--------|--------|
| PLAT007_ALERT_5_G Number of Unrefined Donor-H Atoms .....          | 4      | Report |
| PLAT020_ALERT_3_G The Value of Rint is Greater Than 0.12 .....     | 0.140  | Report |
| PLAT066_ALERT_1_G Predicted and Reported Tmin&Tmax Range Identical | ?      | Check  |
| PLAT083_ALERT_2_G SHELXL Second Parameter in WGHT Unusually Large  | 11.51  | Why ?  |
| PLAT300_ALERT_4_G Atom Site Occupancy of S65A Constrained at       | 0.5769 | Check  |
| PLAT300_ALERT_4_G Atom Site Occupancy of S65B Constrained at       | 0.423  | Check  |
| PLAT300_ALERT_4_G Atom Site Occupancy of H67A Constrained at       | 0.5769 | Check  |
| PLAT300_ALERT_4_G Atom Site Occupancy of H67B Constrained at       | 0.5769 | Check  |
| PLAT300_ALERT_4_G Atom Site Occupancy of H67C Constrained at       | 0.5769 | Check  |
| PLAT300_ALERT_4_G Atom Site Occupancy of H68A Constrained at       | 0.5769 | Check  |
| PLAT300_ALERT_4_G Atom Site Occupancy of H68B Constrained at       | 0.5769 | Check  |
| PLAT300_ALERT_4_G Atom Site Occupancy of H68C Constrained at       | 0.5769 | Check  |
| PLAT300_ALERT_4_G Atom Site Occupancy of H67D Constrained at       | 0.423  | Check  |
| PLAT300_ALERT_4_G Atom Site Occupancy of H67E Constrained at       | 0.423  | Check  |
| PLAT300_ALERT_4_G Atom Site Occupancy of H67F Constrained at       | 0.423  | Check  |
| PLAT300_ALERT_4_G Atom Site Occupancy of H68D Constrained at       | 0.423  | Check  |
| PLAT300_ALERT_4_G Atom Site Occupancy of H68E Constrained at       | 0.423  | Check  |
| PLAT300_ALERT_4_G Atom Site Occupancy of H68F Constrained at       | 0.423  | Check  |
| PLAT300_ALERT_4_G Atom Site Occupancy of S69A Constrained at       | 0.6673 | Check  |
| PLAT300_ALERT_4_G Atom Site Occupancy of S69B Constrained at       | 0.3327 | Check  |

|                   |                                                |                |        |        |
|-------------------|------------------------------------------------|----------------|--------|--------|
| PLAT300_ALERT_4_G | Atom Site Occupancy of H71A                    | Constrained at | 0.6673 | Check  |
| PLAT300_ALERT_4_G | Atom Site Occupancy of H71B                    | Constrained at | 0.6673 | Check  |
| PLAT300_ALERT_4_G | Atom Site Occupancy of H71C                    | Constrained at | 0.6673 | Check  |
| PLAT300_ALERT_4_G | Atom Site Occupancy of H72A                    | Constrained at | 0.6673 | Check  |
| PLAT300_ALERT_4_G | Atom Site Occupancy of H72B                    | Constrained at | 0.6673 | Check  |
| PLAT300_ALERT_4_G | Atom Site Occupancy of H72C                    | Constrained at | 0.6673 | Check  |
| PLAT300_ALERT_4_G | Atom Site Occupancy of H71D                    | Constrained at | 0.3327 | Check  |
| PLAT300_ALERT_4_G | Atom Site Occupancy of H71E                    | Constrained at | 0.3327 | Check  |
| PLAT300_ALERT_4_G | Atom Site Occupancy of H71F                    | Constrained at | 0.3327 | Check  |
| PLAT300_ALERT_4_G | Atom Site Occupancy of H72D                    | Constrained at | 0.3327 | Check  |
| PLAT300_ALERT_4_G | Atom Site Occupancy of H72E                    | Constrained at | 0.3327 | Check  |
| PLAT300_ALERT_4_G | Atom Site Occupancy of H72F                    | Constrained at | 0.3327 | Check  |
| PLAT302_ALERT_4_G | Anion/Solvent/Minor-Residue Disorder (Resd 3 ) |                | 25%    | Note   |
| PLAT302_ALERT_4_G | Anion/Solvent/Minor-Residue Disorder (Resd 4 ) |                | 25%    | Note   |
| PLAT721_ALERT_1_G | Bond Calc 0.96000, Rep 1.14910 Dev...          |                | 0.19   | Ang.   |
|                   | C68 -H68D 1_555 1_555 .....                    | #              | 155    | Check  |
| PLAT721_ALERT_1_G | Bond Calc 0.96000, Rep 1.07810 Dev...          |                | 0.12   | Ang.   |
|                   | C68 -H68E 1_555 1_555 .....                    | #              | 156    | Check  |
| PLAT721_ALERT_1_G | Bond Calc 0.96000, Rep 1.15010 Dev...          |                | 0.19   | Ang.   |
|                   | C68 -H68F 1_555 1_555 .....                    | #              | 157    | Check  |
| PLAT721_ALERT_1_G | Bond Calc 0.96000, Rep 0.98980 Dev...          |                | 0.03   | Ang.   |
|                   | C67 -H67D 1_555 1_555 .....                    | #              | 163    | Check  |
| PLAT721_ALERT_1_G | Bond Calc 0.96000, Rep 0.98930 Dev...          |                | 0.03   | Ang.   |
|                   | C67 -H67E 1_555 1_555 .....                    | #              | 164    | Check  |
| PLAT721_ALERT_1_G | Bond Calc 0.96000, Rep 0.98900 Dev...          |                | 0.03   | Ang.   |
|                   | C67 -H67F 1_555 1_555 .....                    | #              | 165    | Check  |
| PLAT721_ALERT_1_G | Bond Calc 0.96000, Rep 1.00290 Dev...          |                | 0.04   | Ang.   |
|                   | C67 -H67A 1_555 1_555 .....                    | #              | 166    | Check  |
| PLAT721_ALERT_1_G | Bond Calc 0.96000, Rep 1.11700 Dev...          |                | 0.16   | Ang.   |
|                   | C67 -H67B 1_555 1_555 .....                    | #              | 167    | Check  |
| PLAT721_ALERT_1_G | Bond Calc 0.96000, Rep 1.04820 Dev...          |                | 0.09   | Ang.   |
|                   | C67 -H67C 1_555 1_555 .....                    | #              | 168    | Check  |
| PLAT721_ALERT_1_G | Bond Calc 0.96000, Rep 0.97910 Dev...          |                | 0.02   | Ang.   |
|                   | C71 -H71D 1_555 1_555 .....                    | #              | 174    | Check  |
| PLAT721_ALERT_1_G | Bond Calc 0.96000, Rep 0.97940 Dev...          |                | 0.02   | Ang.   |
|                   | C71 -H71E 1_555 1_555 .....                    | #              | 175    | Check  |
| PLAT721_ALERT_1_G | Bond Calc 0.96000, Rep 0.97900 Dev...          |                | 0.02   | Ang.   |
|                   | C71 -H71F 1_555 1_555 .....                    | #              | 176    | Check  |
| PLAT721_ALERT_1_G | Bond Calc 0.96000, Rep 1.22420 Dev...          |                | 0.26   | Ang.   |
|                   | C72 -H72D 1_555 1_555 .....                    | #              | 182    | Check  |
| PLAT721_ALERT_1_G | Bond Calc 0.96000, Rep 1.01540 Dev...          |                | 0.06   | Ang.   |
|                   | C72 -H72E 1_555 1_555 .....                    | #              | 183    | Check  |
| PLAT721_ALERT_1_G | Bond Calc 0.96000, Rep 1.02790 Dev...          |                | 0.07   | Ang.   |
|                   | C72 -H72F 1_555 1_555 .....                    | #              | 184    | Check  |
| PLAT722_ALERT_1_G | Angle Calc 109.00, Rep 154.50 Dev...           |                | 45.50  | Degree |
|                   | S65B -C68 -H68D 1_555 1_555 1_555              | #              | 299    | Check  |
| PLAT722_ALERT_1_G | Angle Calc 109.00, Rep 86.60 Dev...            |                | 22.40  | Degree |
|                   | S65B -C68 -H68E 1_555 1_555 1_555              | #              | 300    | Check  |
| PLAT722_ALERT_1_G | Angle Calc 110.00, Rep 113.00 Dev...           |                | 3.00   | Degree |
|                   | H68D -C68 -H68E 1_555 1_555 1_555              | #              | 301    | Check  |
| PLAT722_ALERT_1_G | Angle Calc 109.00, Rep 86.70 Dev...            |                | 22.30  | Degree |
|                   | S65B -C68 -H68F 1_555 1_555 1_555              | #              | 302    | Check  |
| PLAT722_ALERT_1_G | Angle Calc 110.00, Rep 97.70 Dev...            |                | 12.30  | Degree |
|                   | H68D -C68 -H68F 1_555 1_555 1_555              | #              | 303    | Check  |
| PLAT722_ALERT_1_G | Angle Calc 109.00, Rep 116.90 Dev...           |                | 7.90   | Degree |
|                   | H68E -C68 -H68F 1_555 1_555 1_555              | #              | 304    | Check  |
| PLAT722_ALERT_1_G | Angle Calc 109.00, Rep 112.30 Dev...           |                | 3.30   | Degree |

|                   |       |                      |         |               |        |        |     |              |
|-------------------|-------|----------------------|---------|---------------|--------|--------|-----|--------------|
| S65B              | -C67  | -H67D                | 1_555   | 1_555         | 1_555  | #      | 311 | Check        |
| PLAT722_ALERT_1_G | Angle | Calc                 | 109.00, | Rep           | 112.20 | Dev... |     | 3.20 Degree  |
| S65B              | -C67  | -H67E                | 1_555   | 1_555         | 1_555  | #      | 312 | Check        |
| PLAT722_ALERT_1_G | Angle | Calc                 | 110.00, | Rep           | 106.60 | Dev... |     | 3.40 Degree  |
| H67D              | -C67  | -H67E                | 1_555   | 1_555         | 1_555  | #      | 313 | Check        |
| PLAT722_ALERT_1_G | Angle | Calc                 | 109.00, | Rep           | 112.00 | Dev... |     | 3.00 Degree  |
| S65B              | -C67  | -H67F                | 1_555   | 1_555         | 1_555  | #      | 314 | Check        |
| PLAT722_ALERT_1_G | Angle | Calc                 | 109.00, | Rep           | 106.70 | Dev... |     | 2.30 Degree  |
| H67D              | -C67  | -H67F                | 1_555   | 1_555         | 1_555  | #      | 315 | Check        |
| PLAT722_ALERT_1_G | Angle | Calc                 | 110.00, | Rep           | 106.70 | Dev... |     | 3.30 Degree  |
| H67E              | -C67  | -H67F                | 1_555   | 1_555         | 1_555  | #      | 316 | Check        |
| PLAT722_ALERT_1_G | Angle | Calc                 | 109.00, | Rep           | 157.80 | Dev... |     | 48.80 Degree |
| S65A              | -C67  | -H67A                | 1_555   | 1_555         | 1_555  | #      | 317 | Check        |
| PLAT722_ALERT_1_G | Angle | Calc                 | 109.00, | Rep           | 89.00  | Dev... |     | 20.00 Degree |
| S65A              | -C67  | -H67B                | 1_555   | 1_555         | 1_555  | #      | 318 | Check        |
| PLAT722_ALERT_1_G | Angle | Calc                 | 110.00, | Rep           | 113.20 | Dev... |     | 3.20 Degree  |
| H67A              | -C67  | -H67B                | 1_555   | 1_555         | 1_555  | #      | 319 | Check        |
| PLAT722_ALERT_1_G | Angle | Calc                 | 109.00, | Rep           | 72.90  | Dev... |     | 36.10 Degree |
| S65A              | -C67  | -H67C                | 1_555   | 1_555         | 1_555  | #      | 320 | Check        |
| PLAT722_ALERT_1_G | Angle | Calc                 | 110.00, | Rep           | 96.40  | Dev... |     | 13.60 Degree |
| H67A              | -C67  | -H67C                | 1_555   | 1_555         | 1_555  | #      | 321 | Check        |
| PLAT722_ALERT_1_G | Angle | Calc                 | 109.00, | Rep           | 113.30 | Dev... |     | 4.30 Degree  |
| H67B              | -C67  | -H67C                | 1_555   | 1_555         | 1_555  | #      | 322 | Check        |
| PLAT722_ALERT_1_G | Angle | Calc                 | 109.00, | Rep           | 106.30 | Dev... |     | 2.70 Degree  |
| S69A              | -C71  | -H71A                | 1_555   | 1_555         | 1_555  | #      | 323 | Check        |
| PLAT722_ALERT_1_G | Angle | Calc                 | 109.00, | Rep           | 112.60 | Dev... |     | 3.60 Degree  |
| S69A              | -C71  | -H71B                | 1_555   | 1_555         | 1_555  | #      | 324 | Check        |
| PLAT722_ALERT_1_G | Angle | Calc                 | 109.00, | Rep           | 110.40 | Dev... |     | 1.40 Degree  |
| S69A              | -C71  | -H71C                | 1_555   | 1_555         | 1_555  | #      | 326 | Check        |
| PLAT722_ALERT_1_G | Angle | Calc                 | 110.00, | Rep           | 108.50 | Dev... |     | 1.50 Degree  |
| H71B              | -C71  | -H71C                | 1_555   | 1_555         | 1_555  | #      | 328 | Check        |
| PLAT722_ALERT_1_G | Angle | Calc                 | 109.00, | Rep           | 111.40 | Dev... |     | 2.40 Degree  |
| S69B              | -C71  | -H71D                | 1_555   | 1_555         | 1_555  | #      | 329 | Check        |
| PLAT722_ALERT_1_G | Angle | Calc                 | 109.00, | Rep           | 111.50 | Dev... |     | 2.50 Degree  |
| S69B              | -C71  | -H71E                | 1_555   | 1_555         | 1_555  | #      | 330 | Check        |
| PLAT722_ALERT_1_G | Angle | Calc                 | 110.00, | Rep           | 107.50 | Dev... |     | 2.50 Degree  |
| H71D              | -C71  | -H71E                | 1_555   | 1_555         | 1_555  | #      | 331 | Check        |
| PLAT722_ALERT_1_G | Angle | Calc                 | 109.00, | Rep           | 111.30 | Dev... |     | 2.30 Degree  |
| S69B              | -C71  | -H71F                | 1_555   | 1_555         | 1_555  | #      | 332 | Check        |
| PLAT722_ALERT_1_G | Angle | Calc                 | 110.00, | Rep           | 107.50 | Dev... |     | 2.50 Degree  |
| H71D              | -C71  | -H71F                | 1_555   | 1_555         | 1_555  | #      | 333 | Check        |
| PLAT722_ALERT_1_G | Angle | Calc                 | 110.00, | Rep           | 107.40 | Dev... |     | 2.60 Degree  |
| H71E              | -C71  | -H71F                | 1_555   | 1_555         | 1_555  | #      | 334 | Check        |
| PLAT722_ALERT_1_G | Angle | Calc                 | 110.00, | Rep           | 145.60 | Dev... |     | 35.60 Degree |
| S69B              | -C72  | -H72D                | 1_555   | 1_555         | 1_555  | #      | 341 | Check        |
| PLAT722_ALERT_1_G | Angle | Calc                 | 109.00, | Rep           | 82.00  | Dev... |     | 27.00 Degree |
| S69B              | -C72  | -H72E                | 1_555   | 1_555         | 1_555  | #      | 342 | Check        |
| PLAT722_ALERT_1_G | Angle | Calc                 | 109.00, | Rep           | 104.10 | Dev... |     | 4.90 Degree  |
| H72D              | -C72  | -H72E                | 1_555   | 1_555         | 1_555  | #      | 343 | Check        |
| PLAT722_ALERT_1_G | Angle | Calc                 | 110.00, | Rep           | 101.70 | Dev... |     | 8.30 Degree  |
| S69B              | -C72  | -H72F                | 1_555   | 1_555         | 1_555  | #      | 344 | Check        |
| PLAT722_ALERT_1_G | Angle | Calc                 | 109.00, | Rep           | 107.00 | Dev... |     | 2.00 Degree  |
| H72D              | -C72  | -H72F                | 1_555   | 1_555         | 1_555  | #      | 345 | Check        |
| PLAT722_ALERT_1_G | Angle | Calc                 | 109.00, | Rep           | 111.80 | Dev... |     | 2.80 Degree  |
| H72E              | -C72  | -H72F                | 1_555   | 1_555         | 1_555  | #      | 346 | Check        |
| PLAT793_ALERT_4_G | Model | has Chirality at N1  |         | (Centro SPGR) |        |        |     | R Verify     |
| PLAT793_ALERT_4_G | Model | has Chirality at N17 |         | (Centro SPGR) |        |        |     | R Verify     |

|                                                                    |               |             |
|--------------------------------------------------------------------|---------------|-------------|
| PLAT793_ALERT_4_G Model has Chirality at N33                       | (Centro SPGR) | S Verify    |
| PLAT793_ALERT_4_G Model has Chirality at N49                       | (Centro SPGR) | S Verify    |
| PLAT793_ALERT_4_G Model has Chirality at C6                        | (Centro SPGR) | S Verify    |
| PLAT793_ALERT_4_G Model has Chirality at C22                       | (Centro SPGR) | S Verify    |
| PLAT793_ALERT_4_G Model has Chirality at C38                       | (Centro SPGR) | R Verify    |
| PLAT793_ALERT_4_G Model has Chirality at C54                       | (Centro SPGR) | R Verify    |
| PLAT794_ALERT_5_G Tentative Bond Valency for Zn1                   | (II) .        | 1.97 Info   |
| PLAT794_ALERT_5_G Tentative Bond Valency for Zn2                   | (II) .        | 1.96 Info   |
| PLAT883_ALERT_1_G No Info/Value for _atom_sites_solution_primary   | .             | Please Do ! |
| PLAT912_ALERT_4_G Missing # of FCF Reflections Above STh/L=        | 0.600         | 316 Note    |
| PLAT978_ALERT_2_G Number C-C Bonds with Positive Residual Density. |               | 0 Info      |

---

0 **ALERT level A** = Most likely a serious problem - resolve or explain  
 1 **ALERT level B** = A potentially serious problem, consider carefully  
 16 **ALERT level C** = Check. Ensure it is not caused by an omission or oversight  
 96 **ALERT level G** = General information/check it is not something unexpected

51 ALERT type 1 CIF construction/syntax error, inconsistent or missing data  
 5 ALERT type 2 Indicator that the structure model may be wrong or deficient  
 10 ALERT type 3 Indicator that the structure quality may be low  
 44 ALERT type 4 Improvement, methodology, query or suggestion  
 3 ALERT type 5 Informative message, check

---

It is advisable to attempt to resolve as many as possible of the alerts in all categories. Often the minor alerts point to easily fixed oversights, errors and omissions in your CIF or refinement strategy, so attention to these fine details can be worthwhile. In order to resolve some of the more serious problems it may be necessary to carry out additional measurements or structure refinements. However, the purpose of your study may justify the reported deviations and the more serious of these should normally be commented upon in the discussion or experimental section of a paper or in the "special\_details" fields of the CIF. checkCIF was carefully designed to identify outliers and unusual parameters, but every test has its limitations and alerts that are not important in a particular case may appear. Conversely, the absence of alerts does not guarantee there are no aspects of the results needing attention. It is up to the individual to critically assess their own results and, if necessary, seek expert advice.

### Publication of your CIF in IUCr journals

A basic structural check has been run on your CIF. These basic checks will be run on all CIFs submitted for publication in IUCr journals (*Acta Crystallographica*, *Journal of Applied Crystallography*, *Journal of Synchrotron Radiation*); however, if you intend to submit to *Acta Crystallographica Section C* or *E* or *IUCrData*, you should make sure that full publication checks are run on the final version of your CIF prior to submission.

### Publication of your CIF in other journals

Please refer to the *Notes for Authors* of the relevant journal for any special instructions relating to CIF submission.

PLATON version of 12/09/2022; check.def file version of 09/08/2022

Datablock ba15\_0ma\_a - ellipsoid plot

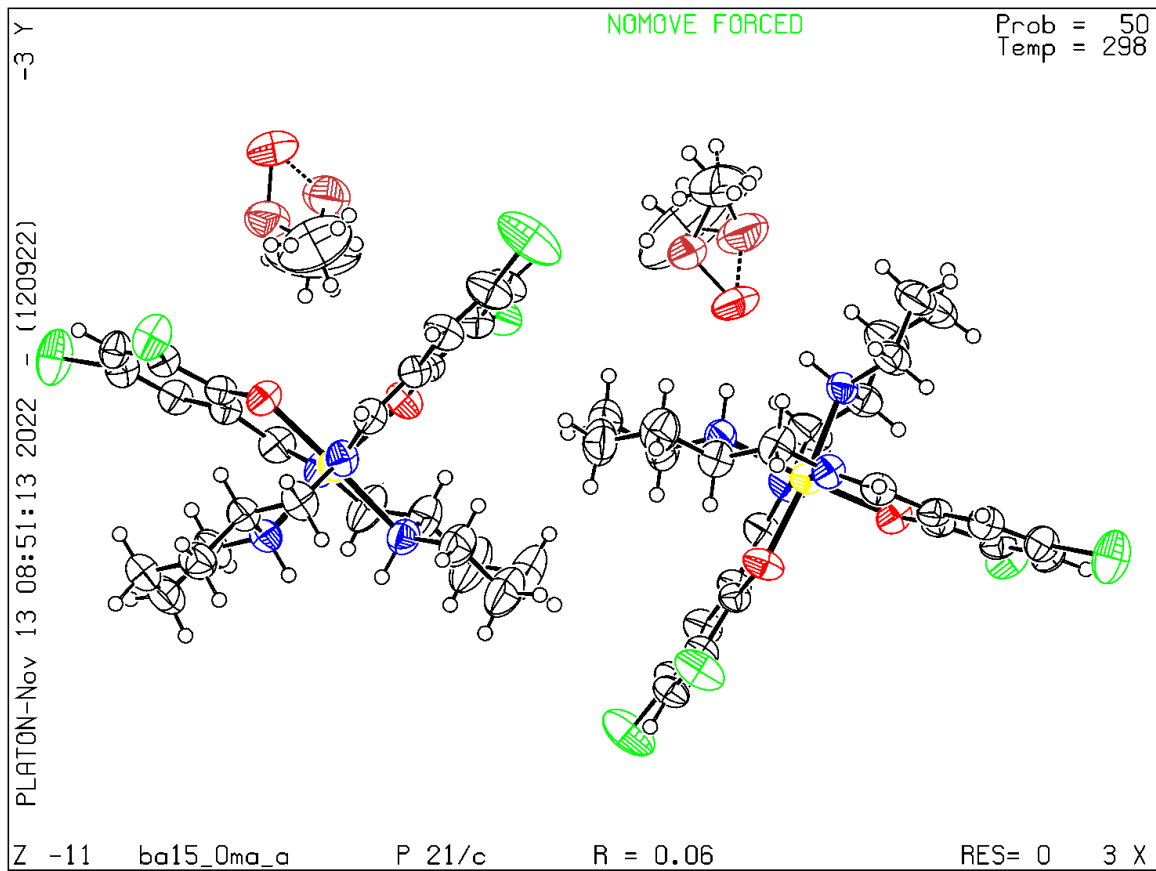

Supplement: d2an01938h1.zip [file d2an01938h1.zip]
