# Supplementary material for: Solvent-regulated fluorescence off–on signaling of Ni(ii) and Zn(ii) with the formation of two mononuclear complexes with an ATP detection ability by Zn(ii) assembly
Source: Royal Society of Chemistry journal article supplement (doi:10.1039/d2an01938h), 2022-12-20
Supplement: d2an01938h2.pdf [file d2an01938h2.pdf]

## Solvent-regulated fluorescence off-on signaling of Ni(II) and Zn(II) with the formation of two mononuclear complexes with ATP detection ability by Zn(II) assembly

Subham Ray<sup>a</sup>, Uttam Kumar Das<sup>ba\*</sup>, Soumik Laha<sup>c</sup>, Manik Das<sup>a</sup>, Arijit Bag<sup>d</sup>, Indranil Choudhuri<sup>e</sup>, Nandan Bhattacharya<sup>e</sup>, Bidhan Chandra Samanta<sup>f</sup>, Tithi Maity<sup>a</sup>

<sup>a</sup> Department of Chemistry, Prabhat Kumar College, Contai, Purba Medinipur, West Bengal, 721404, India

<sup>b</sup> Department of Chemistry, School of Physical Science, Mahatma Gandhi Central University, Bihar, India

<sup>c</sup> Indian Institute of Chemical Biology, Jadavpur, Kolkata, West Bengal, India.

<sup>d</sup> School of Natural and Applied Sciences, Maulana Abul Kalam Azad University of Technology, West Bengal, India

<sup>e</sup> Department of Biotechnology, Panskura Banamali College, Panskura West Bengal, India.

<sup>f</sup> Department of Chemistry, Mugberia Gangadhar Mahavidyalaya, Purba Medinipur, India

Email: [titlipkc2008@gmail.com](mailto:titlipkc2008@gmail.com), [uttamkumardas@mgcub.ac.in](mailto:uttamkumardas@mgcub.ac.in)

| Figure/Table | Content | Page |
|--------------|---------|------|
|--------------|---------|------|

| No              |                                                                                                                                                                                                                                                                                                                          | number |
|-----------------|--------------------------------------------------------------------------------------------------------------------------------------------------------------------------------------------------------------------------------------------------------------------------------------------------------------------------|--------|
| <b>Fig. S1</b>  | FTIR spectrum of <b>HL</b>                                                                                                                                                                                                                                                                                               | S3     |
| <b>Fig. S2</b>  | FTIR spectrum of complex <b>1</b>                                                                                                                                                                                                                                                                                        | S4     |
| <b>Fig. S3</b>  | FTIR spectrum of complex <b>2</b>                                                                                                                                                                                                                                                                                        | S5     |
| <b>Fig. S4</b>  | UV spectrum of <b>HL</b> , complex <b>1</b> and complex <b>2</b>                                                                                                                                                                                                                                                         | S5     |
| <b>Fig. S5</b>  | Mass spectrum of <b>HL</b>                                                                                                                                                                                                                                                                                               | S6     |
| <b>Fig. S6</b>  | Mass spectrum of complex <b>1</b>                                                                                                                                                                                                                                                                                        | S6     |
| <b>Fig. S7</b>  | Mass spectrum of complex <b>2</b>                                                                                                                                                                                                                                                                                        | S7     |
| <b>Fig. S8</b>  | Molecular plot of complex <b>1</b>                                                                                                                                                                                                                                                                                       | S7     |
| <b>Fig. S9</b>  | Molecular plot of complex <b>2</b>                                                                                                                                                                                                                                                                                       | S8     |
| <b>Fig. S10</b> | Absorbance alteration of <b>HL</b> ( $3 \times 10^{-5} \text{ M}^{-1}$ ) as a function of time in a) methanol: H <sub>2</sub> O (9:1) HEPES buffer b) pure HEPES medium                                                                                                                                                  | S8     |
| <b>Fig. S11</b> | In different pH the fluorescence intensity changes of free <b>HL</b> ( $3 \times 10^{-5} \text{ M}^{-1}$ ) a) at 453 nm in the absence and presence (four equivalent) of Zn(II)/Ni(II) in methanol-water HEPES buffer medium b) at 512 nm in the absence and presence (four equivalent) of Zn(II) in HEPES buffer medium | S9     |
| <b>Fig. S12</b> | Change of fluorescence emission intensity of <b>HL</b> as a function of a) Zn(II) and Ni(II) concentration for detection limit calculation in a) methanol /water 9:1 HEPES buffer medium b) Zn(II) only in pure HEPES buffer medium, used to measure limit of detection.                                                 | S9     |
| <b>Fig. S13</b> | a) During recognition of Zn(II) and Ni(II) in methanol-water medium b) Zn(II) in HEPES buffer medium by <b>HL</b> , the Binding constant measurement by utilizing probe-analyte fluoresce enhancement titration pictograph.                                                                                              | S10    |
| <b>Fig. S14</b> | Fluorescence intensity change of a) <b>HL</b> -Zn(II) b) <b>HL</b> -Ni(II) adduct in methanol water (9:1) HEPES buffer medium in the presence of four equivalent of various competitive cations.                                                                                                                         | S10    |
| <b>Fig. S15</b> | Selective sensing of Zn(II) in presence of Ni(II) or vice versa in the semi-aqueous medium                                                                                                                                                                                                                               | S11    |
| <b>Fig. S16</b> | Jobs plot of 1:1 probe-analyte adduct formation during sensing of a) ATP by complex <b>2</b> in purely HEPES buffer medium.                                                                                                                                                                                              | S12    |
| <b>Fig. S17</b> | The theoretically obtained (TDDFT) UV spectrum of complex <b>2</b> and complex <b>2</b> -ATP adduct                                                                                                                                                                                                                      | S12    |
| <b>Fig. S18</b> | Dose dependent suppression of cell viability of <b>HL</b> and complex <b>2</b> on HeLa cell line (24 hrs)                                                                                                                                                                                                                | S13    |
| <b>Table S1</b> | <b>C-H... Br</b> interaction parameter of complex <b>1</b>                                                                                                                                                                                                                                                               | S13    |
| <b>Table S2</b> | Hydrogen bonding parameter of complex <b>2</b>                                                                                                                                                                                                                                                                           | S13    |
| <b>Table S3</b> | <b>C-H... Br</b> interaction parameter of complex <b>2</b>                                                                                                                                                                                                                                                               | S14    |
| <b>Table S4</b> | Reference table of the simple Schiff base ligand with their activity towards Zn(II) and Ni(II) sensing                                                                                                                                                                                                                   | S14    |

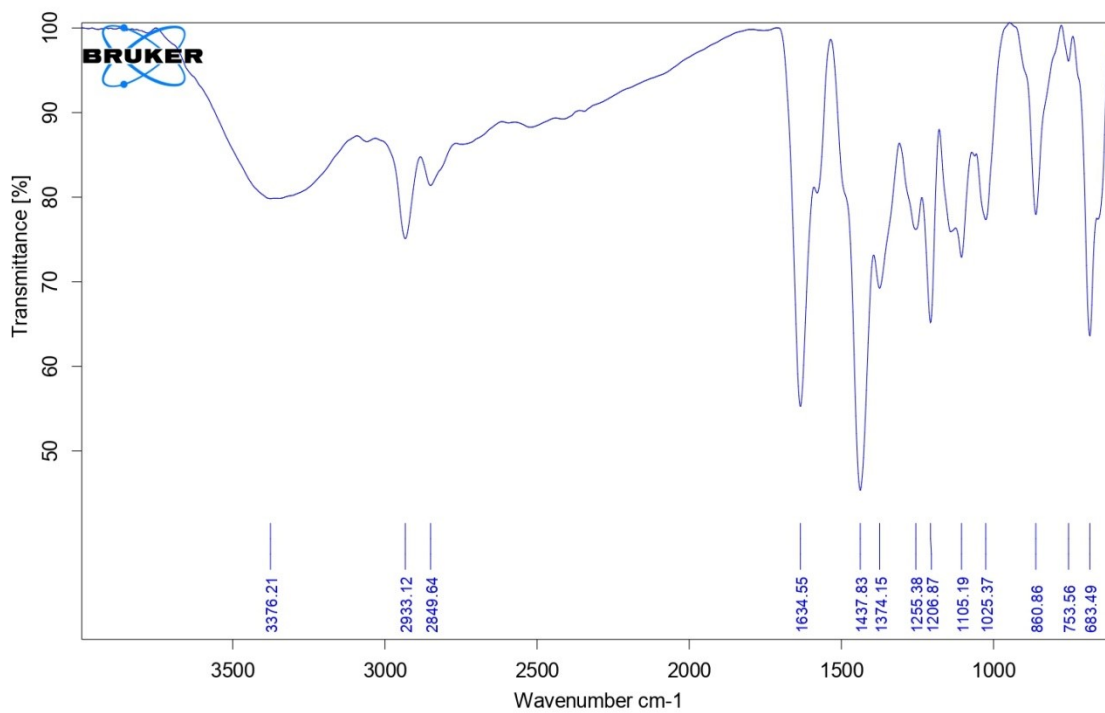

**Fig. S1:** FTIR spectrum of **HL**

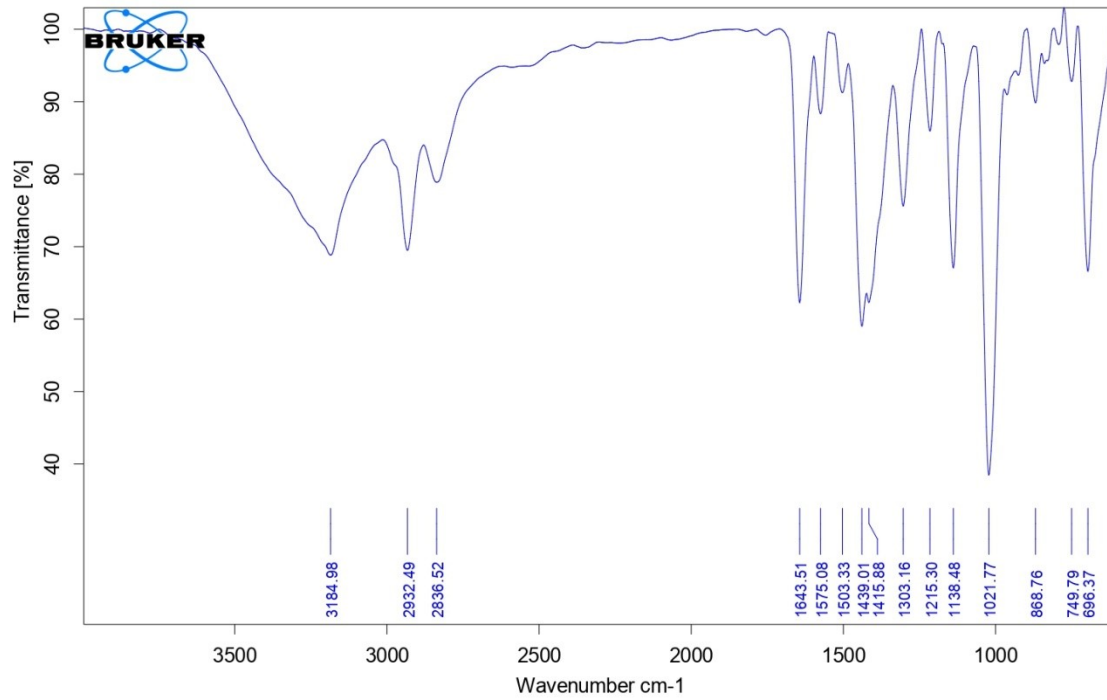

**Fig. S2:** FTIR spectrum of complex **1**

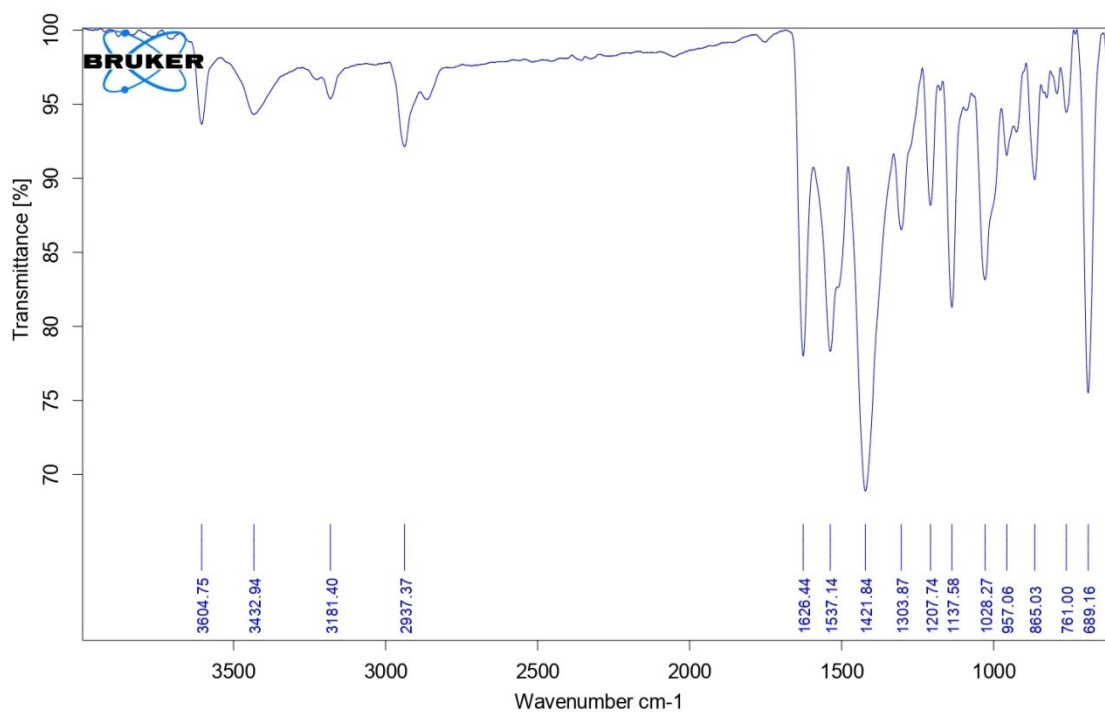

**Fig. S3:** FTIR spectrum of complex 2

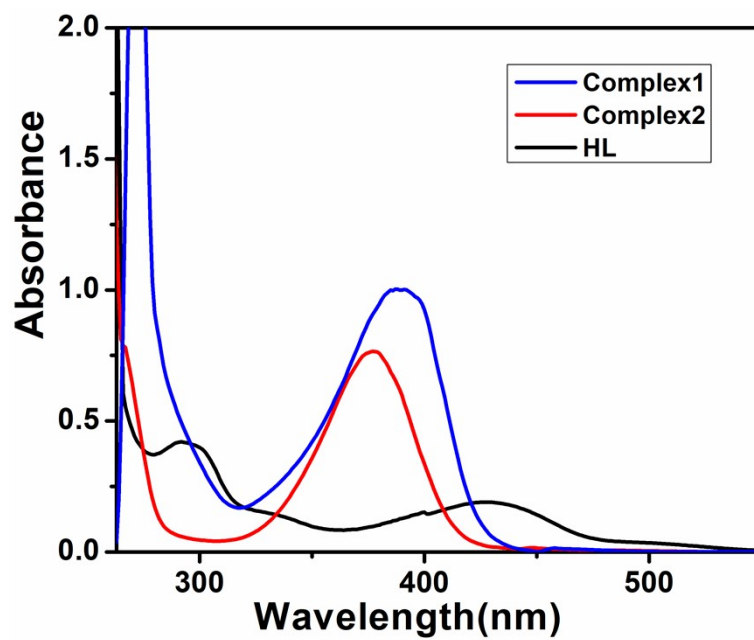

**Fig.S4:** UV spectrum of HL, complex 1 and complex 2

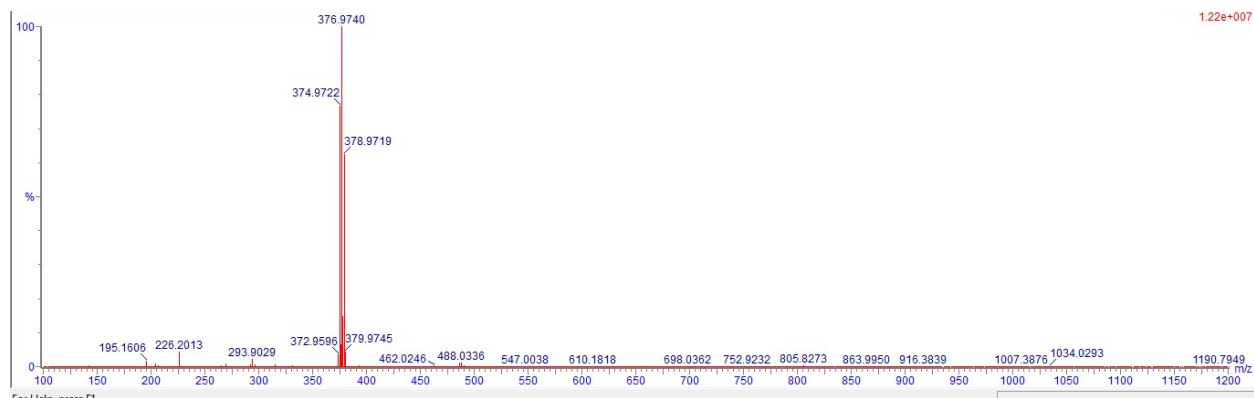

**Fig. S5: Mass spectrum of HL**

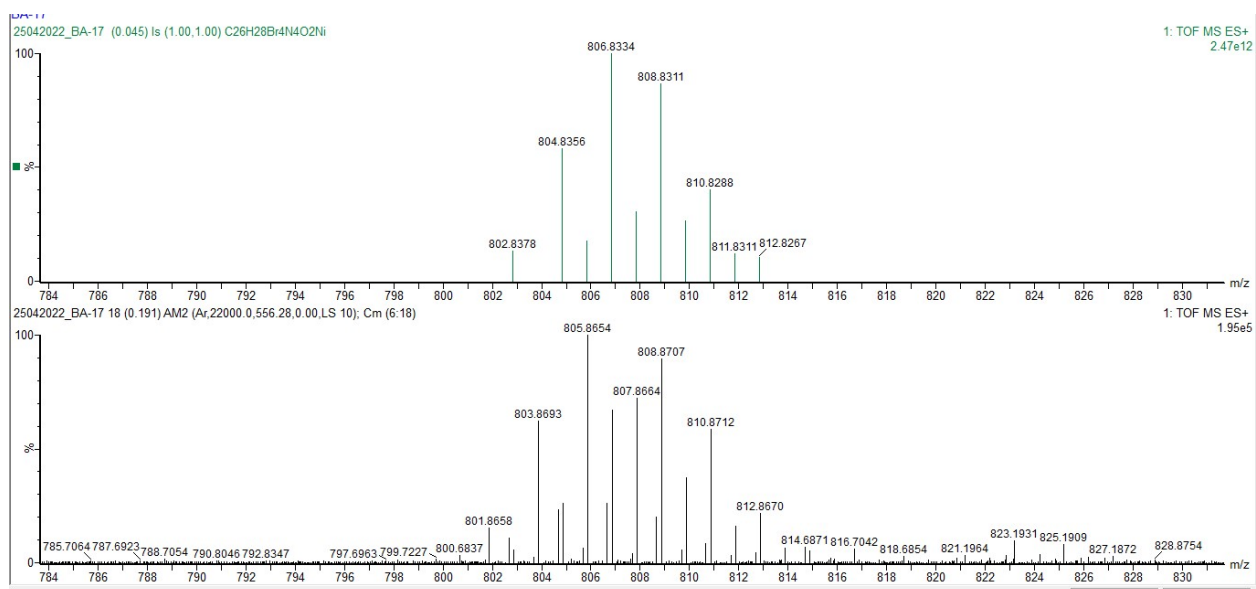

**Fig. S6: FTIR spectrum of complex 1**

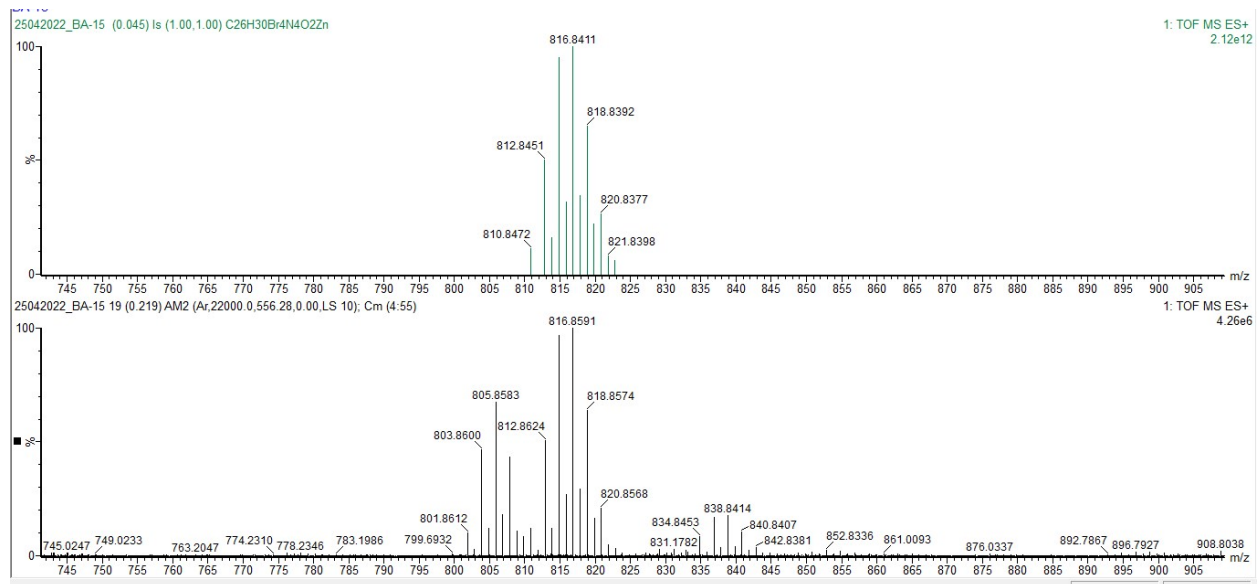

Fig. S7: Mass spectrum of complex 2

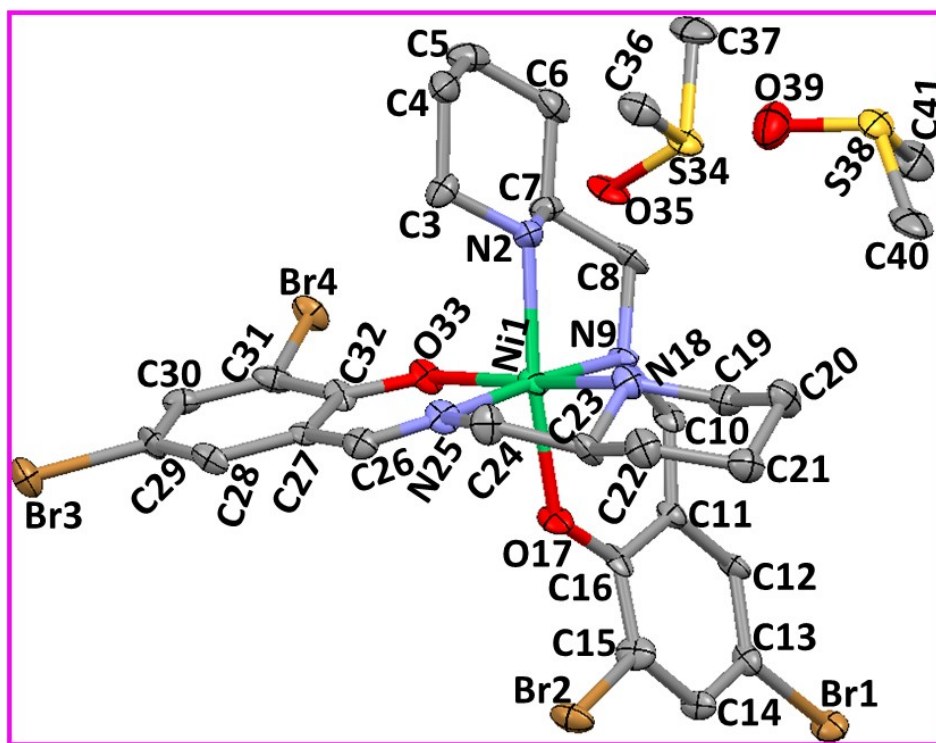

Fig. S8: Molecular plot of complex 1

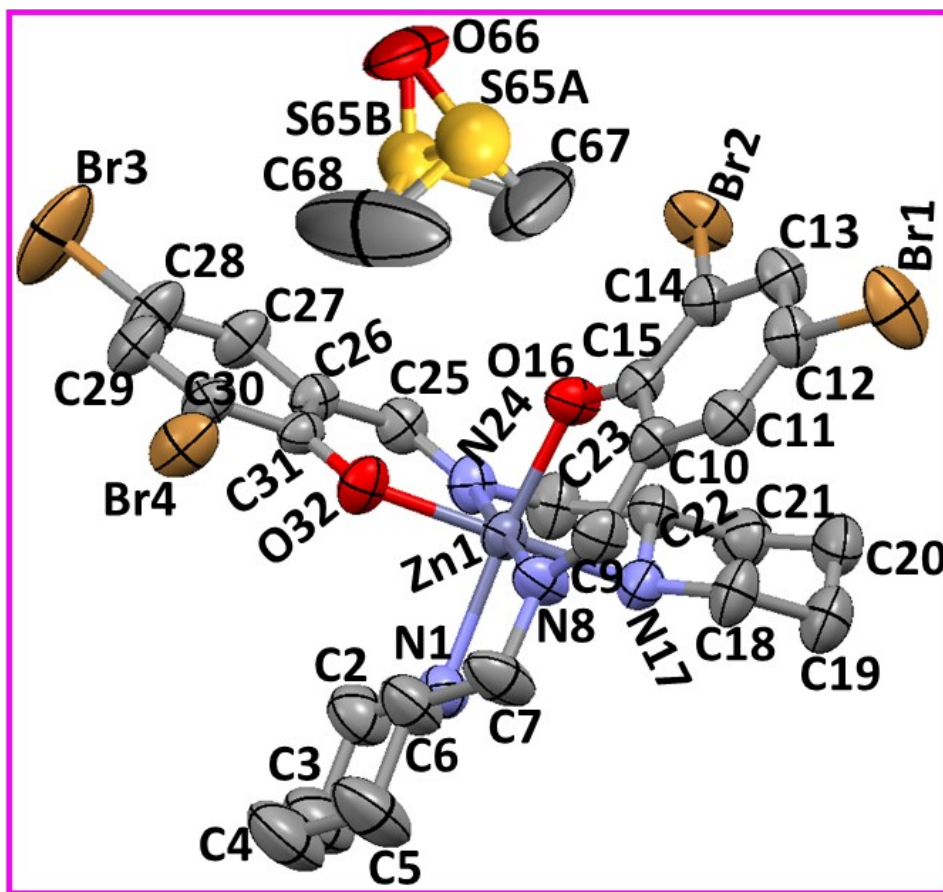

Fig. S9: Molecular plot of complex 2

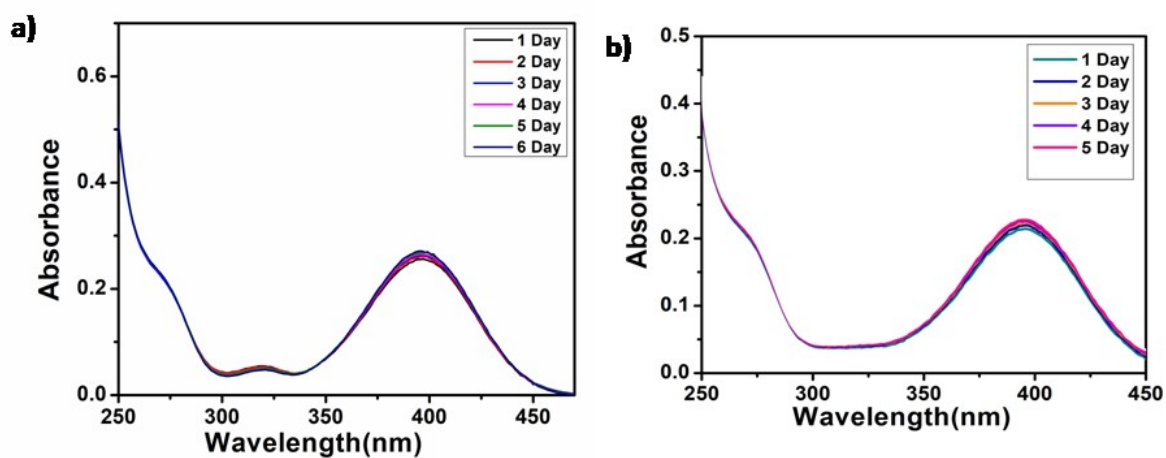

Fig. S10: Absorbance alteration of HL ( $3 \times 10^{-5} \text{ M}^{-1}$ ) as a function of time in a) methanol:  $\text{H}_2\text{O}$  (9:1) HEPES buffer b) pure HEPES medium



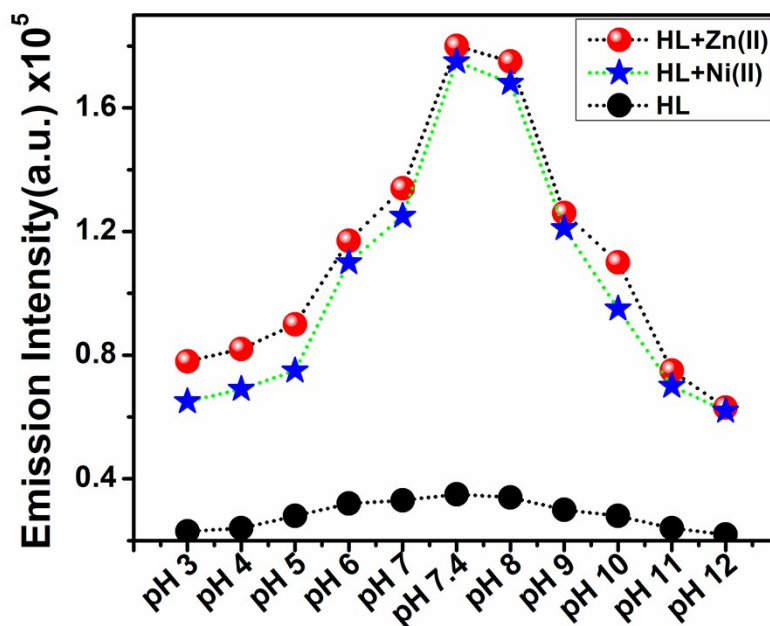

**Fig. S11:** In different pH the fluorescence intensity changes of free **HL** ( $3 \times 10^{-5} \text{ M}^{-1}$ ) a) at 453 nm in the absence and presence (four equivalent) of Zn(II)/Ni(II) in methanol-water HEPES buffer medium.

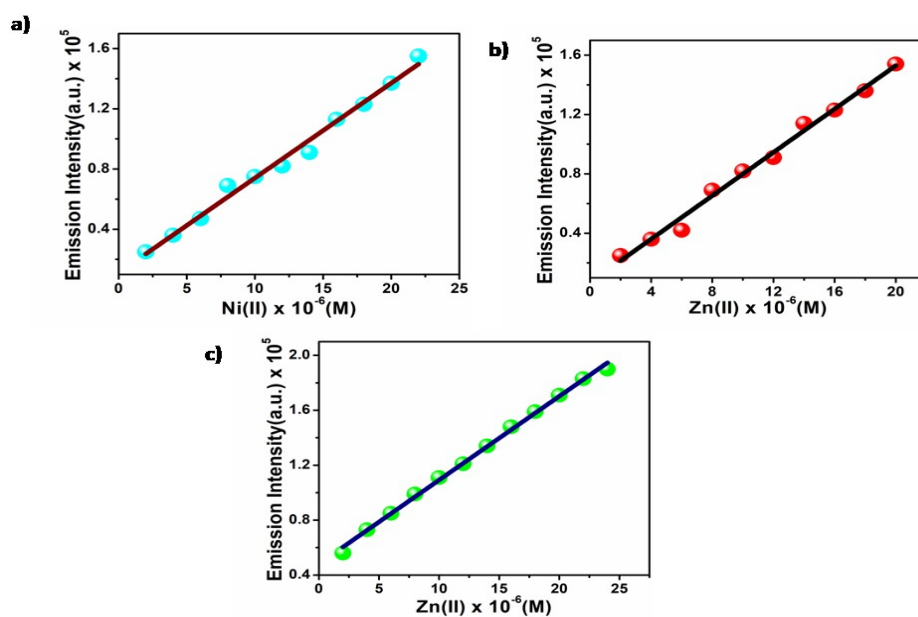

**Fig. S12:** Change of fluorescence emission intensity of **HL** as a function of a) Zn(II) and Ni(II) concentration for detection limit calculation in a) methanol /water 9:1 HEPES buffer medium b) Zn(II) only in pure HEPES buffer medium, used to measure limit of detection.

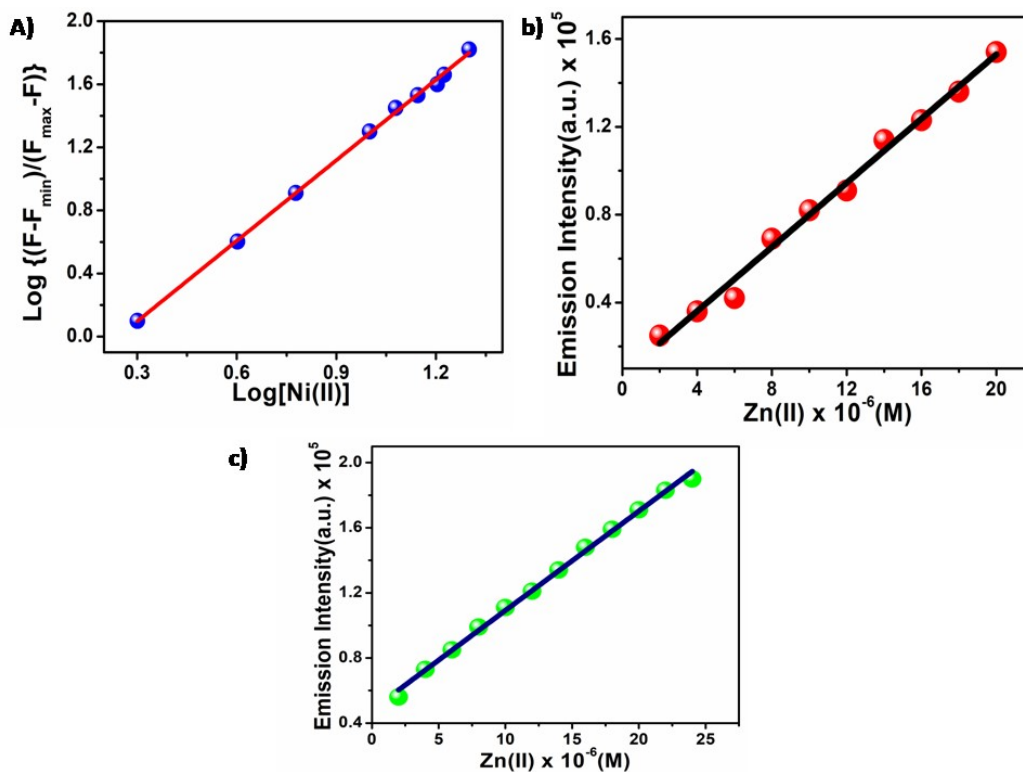

**Fig. S13:** a) During recognition of Zn(II) and Ni(II) in methanol-water medium b) Zn(II) in HEPES buffer medium by HL, the Binding constant measurement by utilizing probe-analyte fluoresce enhancement titration pictograph.

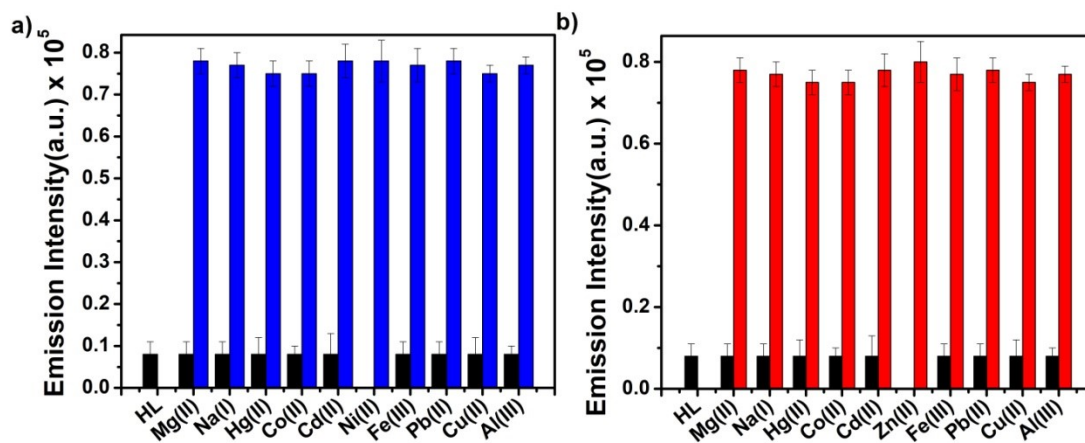

**Fig. S14:** Fluorescence intensity change of a) HL-Zn(II) b) HL-Ni(II) adduct in methanol water (9:1) HEPES buffer medium in the presence of four equivalent of various competitive cations.

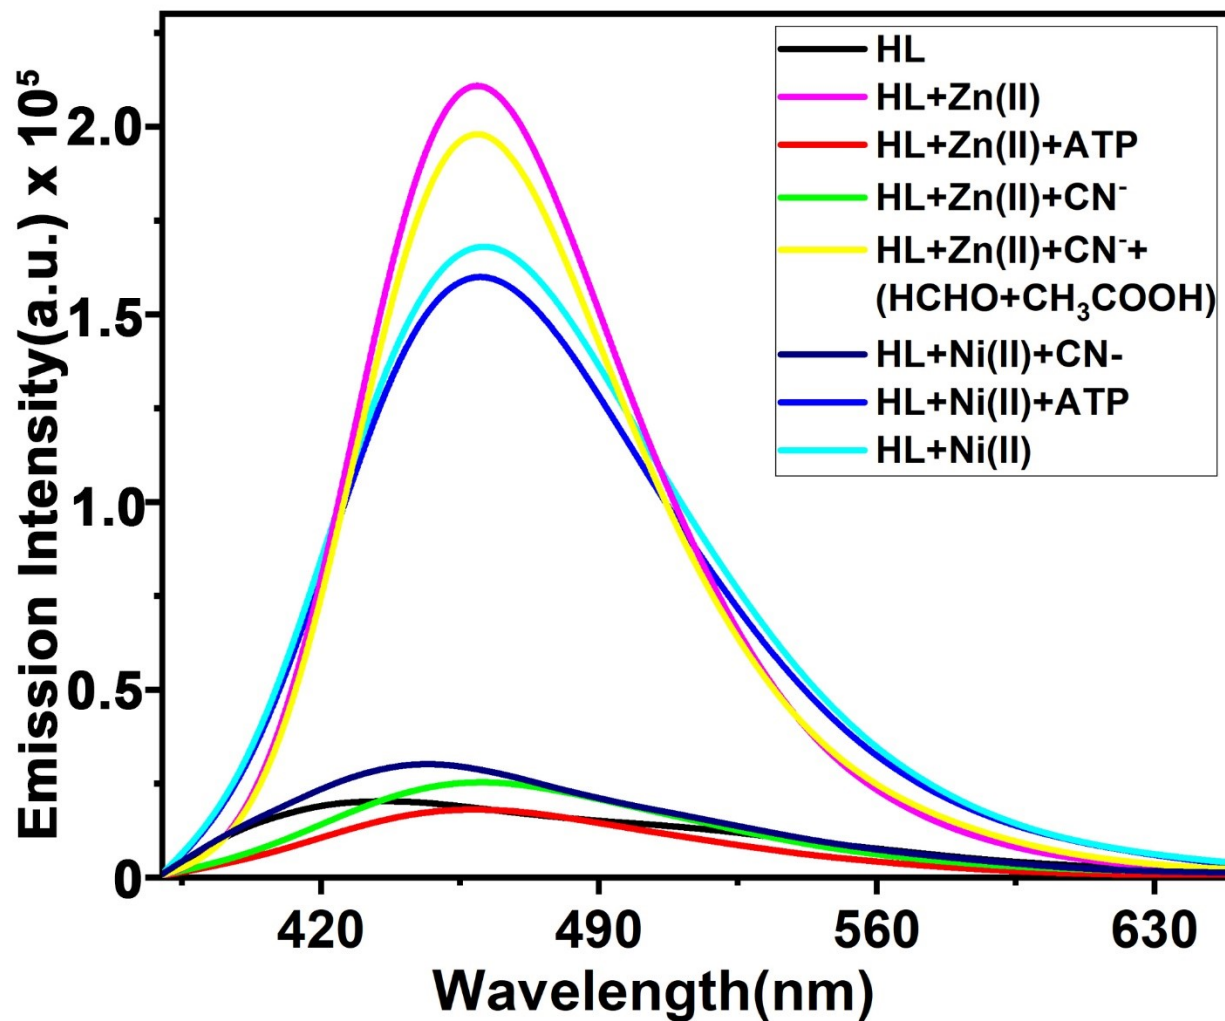

Fig. S15: Selective sensing of Zn(II) in presence of Ni(II) or vice versa in the semi-aqueous medium.

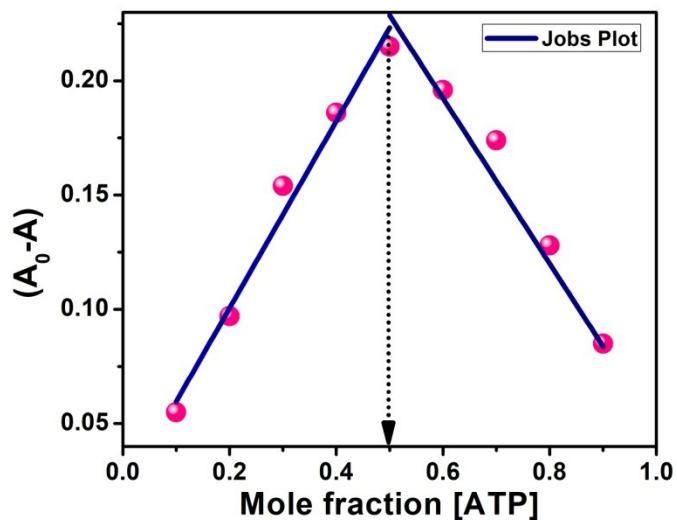

**Fig. S16:** Jobs plot of 1:1 probe-analyte adduct formation during sensing of ATP by complex 2 in purely HEPES buffer medium.

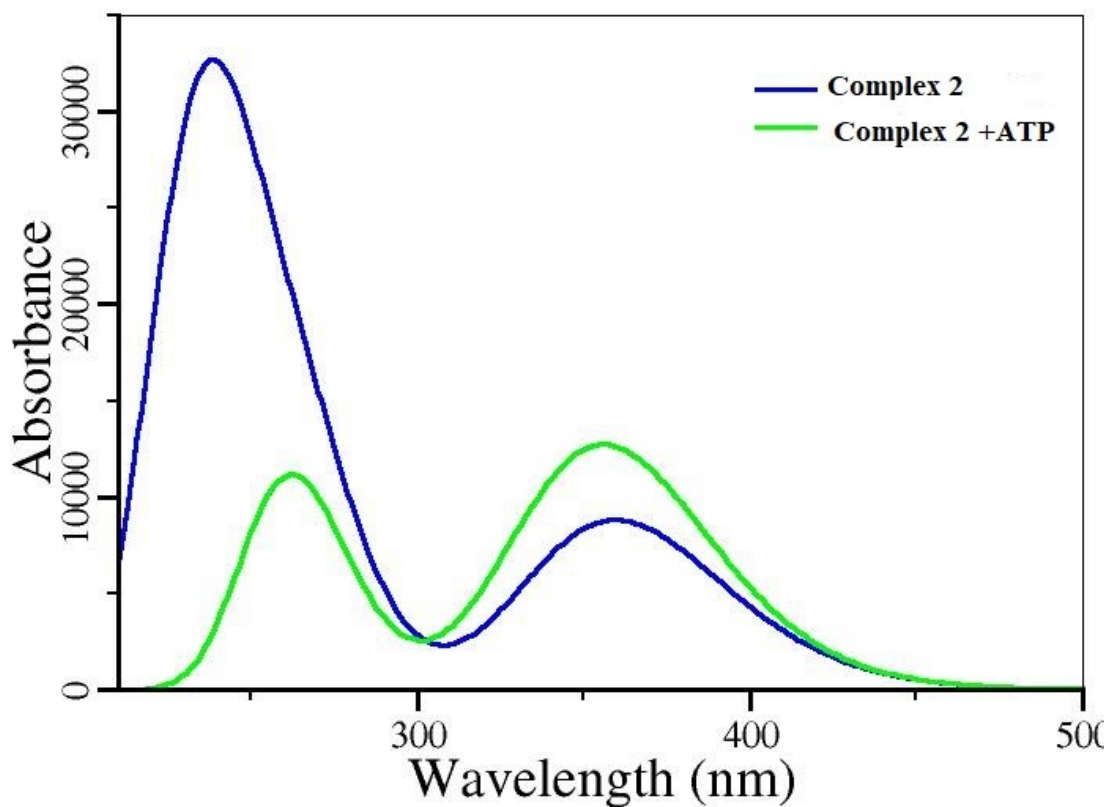

**Fig. S17:** The theoretically obtained (TDDFT) UV spectrum of complex 2 and complex 2-ATP adduct

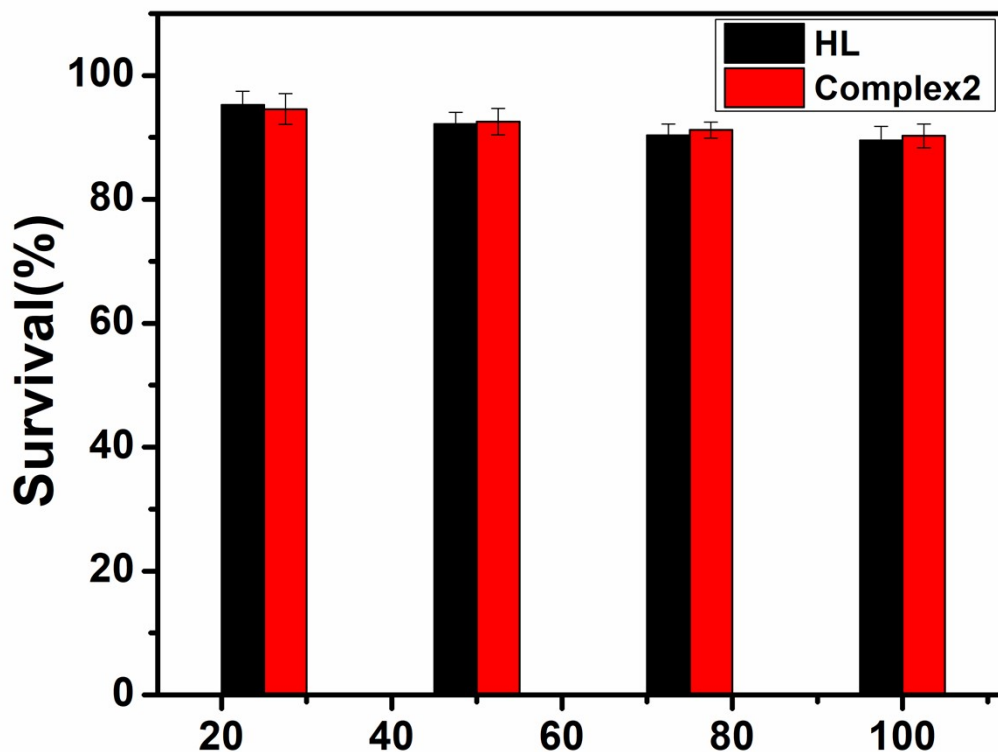

**Fig. S18:** Dose dependent suppression of cell viability of **HL** and complex **2** on HeLa cell line (24 hrs)

**Table S1:** C-H... Br interaction parameter of complex **1**

| C-H...Br           | C-H (Å) | H...Br (Å) | C...Br (Å) | C-H...Br (°) | Symmetry operation for A |
|--------------------|---------|------------|------------|--------------|--------------------------|
| C(40)-H(40A)...Br2 | 0.98    | 2.98       | 3.668(6)   | 128.3        | $x, -y+3/2, z+1/2$       |
| C(28)-H(28)... Br2 | 0.95    | 3.02       | 3.828(4)   | 143.9        | $-x+1, -y+2, -z+1$       |

**Table S2:** Hydrogen bonding parameter of complex **2**

| D-H...A           | D-H (Å) | H...A (Å) | D...A (Å) | D-H...A (°) | Symmetry operation for A |
|-------------------|---------|-----------|-----------|-------------|--------------------------|
| N(17)-H(17)...O66 | 0.87(5) | 2.14(5)   | 2.959(7)  | 156(4)      | $-x, y-1/2, -z+1/2$      |
| N(33)-H(33)...O70 | 0.85(5) | 2.15(6)   | 2.978(6)  | 165(5)      | $x, y, z$                |
| N(49)-H(49)...O70 | 0.79(7) | 2.32(7)   | 3.025(7)  | 149(7)      | $x, y, z$                |

**Table S3: C-H... Br interaction parameter of complex 2**

| C-H...Br          | C-H (Å) | H...Br (Å) | C...Br (Å) | C-H...Br (°) | Symmetry operation for A |
|-------------------|---------|------------|------------|--------------|--------------------------|
| C(13)-H(13)...Br8 | 0.93    | 2.97       | 3.839(5)   | 155.4        | -x, y+1/2, -z+1/2        |
| C(27)-H(27)...Br4 | 0.93    | 2.93       | 3.761(5)   | 149.5        | x, -y+3/2, z+1/2         |
| C(29)-H(29)...Br6 | 0.93    | 2.92       | 3.636(5)   | 134.9        | -x+1, y+1/2, -z+1/2      |
| C(59)-H(59)...Br6 | 0.93    | 3.00       | 3.881(5)   | 159.0        | -x+1, -y+1, -z           |
| C(34)-H(34)...Br3 | 0.97    | 2.97       | 3.830(6)   | 148.0        | x, -y+3/2, z-1/2         |

**Table S4: Reference table of the simple Schiff base ligand with their activity towards Zn(II) and Ni(II) sensing**

| Probe                                                                               | Cation detection                                             | LOD (M)                                                              | Crystal obtained | Solvent / solvent sensitivity for multi cation | Probe reversibility | Applications                                     | Solid Metal-ligand complex for 2 <sup>nd</sup> step sensing | references |
|-------------------------------------------------------------------------------------|--------------------------------------------------------------|----------------------------------------------------------------------|------------------|------------------------------------------------|---------------------|--------------------------------------------------|-------------------------------------------------------------|------------|
| 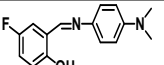 | Zn <sup>2+</sup>                                             | 2.6×10 <sup>-7</sup>                                                 | No               | EtOH-H <sub>2</sub> O (1:2)                    | No                  | No                                               | No                                                          | 1          |
|  | Zn <sup>2+</sup> ,                                           | 4.1×10 <sup>-7</sup>                                                 | Yes              | MeOH-H <sub>2</sub> O (1:9)                    | No                  | live cells imaging                               | No                                                          | 2          |
|  | Zn <sup>2+</sup> ,<br>Mg <sup>2+</sup>                       | 3.0×10 <sup>-7</sup><br>2.9×10 <sup>-8</sup>                         | No,<br>No        | DMF-H <sub>2</sub> O (9:1)<br>MeCN/Yes         | No                  | live cells imaging,<br>Tap water,<br>Real sample | No                                                          | 3          |
|  | Zn <sup>2+</sup> ,<br>Mg <sup>2+</sup> ,<br>Co <sup>2+</sup> | 1.8×10 <sup>-6</sup><br>7.0×10 <sup>-9</sup><br>2.9×10 <sup>-8</sup> | No,<br>No,<br>No | MeCN-H <sub>2</sub> O (9:1)/No                 | No                  | live cells imaging                               | No                                                          | 4          |
|  | Ni <sup>2+</sup>                                             | 1.0×10 <sup>-7</sup>                                                 | No               | DMSO-H <sub>2</sub> O (1:1)                    | No                  | No                                               | No                                                          | 5          |
|  | Zn <sup>2+</sup>                                             | 1.0×10 <sup>-7</sup>                                                 | Yes              | H <sub>2</sub> O (HEPES buffer)                | Yes                 | Fluorescence image in plant root                 | No                                                          | 6          |
|  | Zn <sup>2+</sup> ,<br>Ni <sup>2+</sup>                       | 1.6×10 <sup>-7</sup><br>6.9×10 <sup>-7</sup>                         | No               | DMSO-H <sub>2</sub> O (9:1)/No                 | Yes                 | No                                               | No                                                          | 7          |

|                                                                                     |                                        |                                              |                                                  |                                                                     |     |                                                             |                      |    |
|-------------------------------------------------------------------------------------|----------------------------------------|----------------------------------------------|--------------------------------------------------|---------------------------------------------------------------------|-----|-------------------------------------------------------------|----------------------|----|
| 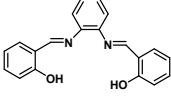   | Ni <sup>2+</sup>                       | 1.0×10 <sup>-4</sup>                         | Yes                                              | MeCN                                                                | No  | No                                                          | No                   | 8  |
|    | Zn <sup>2+</sup> ,<br>Ni <sup>2+</sup> | 7.2×10 <sup>-8</sup>                         | No                                               | DMSO-H <sub>2</sub> O<br>(9:1, v/v),                                | No  | live cells<br>imaging                                       | No                   | 9  |
|    | Al <sup>3+</sup> ,<br>Zn <sup>2+</sup> | 9.0×10 <sup>-7</sup><br>6.6×10 <sup>-9</sup> | No                                               | MeOH-H <sub>2</sub> O<br>(9:1)<br>DMF/H <sub>2</sub> O<br>(9:1)/Yes | No  | No                                                          | No                   | 10 |
|    | Zn <sup>2+</sup>                       | 9.6×10 <sup>-8</sup>                         | No                                               | DMSO/H <sub>2</sub> O<br>(9:1)                                      | Yes | On-site<br>detection<br>,<br>live cells<br>imaging          | No                   | 11 |
|    | Zn <sup>2+</sup> ,<br>Cu <sup>2+</sup> | 3.2×10 <sup>-8</sup><br>2.1×10 <sup>-8</sup> | No                                               | MeOH-H <sub>2</sub> O<br>(9:1) /No                                  | Yes | live cells<br>imaging                                       | No                   | 12 |
|   | Zn <sup>2+</sup>                       | 5.3×10 <sup>-8</sup>                         | Yes                                              | MeOH-H <sub>2</sub> O<br>(9:1)                                      | Yes | live cells<br>imaging                                       | No                   | 13 |
|  | Zn <sup>2+</sup>                       | 3.7×10 <sup>-7</sup>                         | Yes                                              | MeOH-H <sub>2</sub> O<br>(9:1)                                      | Yes | DNA, HSA<br>Interaction<br>,<br>Heavy<br>metal<br>detection | No                   | 14 |
|  | Ni <sup>2+</sup>                       | 2.3×10 <sup>-5</sup>                         | No                                               | EtOH                                                                | No  | Paper<br>strip                                              | No                   | 15 |
|  | Ni <sup>2+</sup>                       | 1.8×10 <sup>-6</sup>                         | Yes                                              | MeOH/H <sub>2</sub> O<br>(1:1)                                      | No  | live cells<br>imaging                                       | No                   | 16 |
| Our Probe<br>(HL)                                                                   | Zn <sup>2+</sup> ,<br>Ni <sup>2+</sup> |                                              | Yes<br>(crystal<br>obtained<br>in both<br>cases) | H <sub>2</sub> O<br>(1:1)<br>MeO-H <sub>2</sub> O<br>(9:1)/Yes      | Yes | live cells<br>imaging,<br>,                                 | Yes/ATP<br>detection |    |
